# Supplementary material for: Evolutionary Constraint and Disease Associations of Post-Translational Modification Sites in Human Genomes
Source: PLOS journal article supplement (doi:10.1371/journal.pgen.1004919), 2015-01-22

# PTM regions have lower non-synonymous to synonymous mutation (Ka/Ks) ratios across the variation spectrum

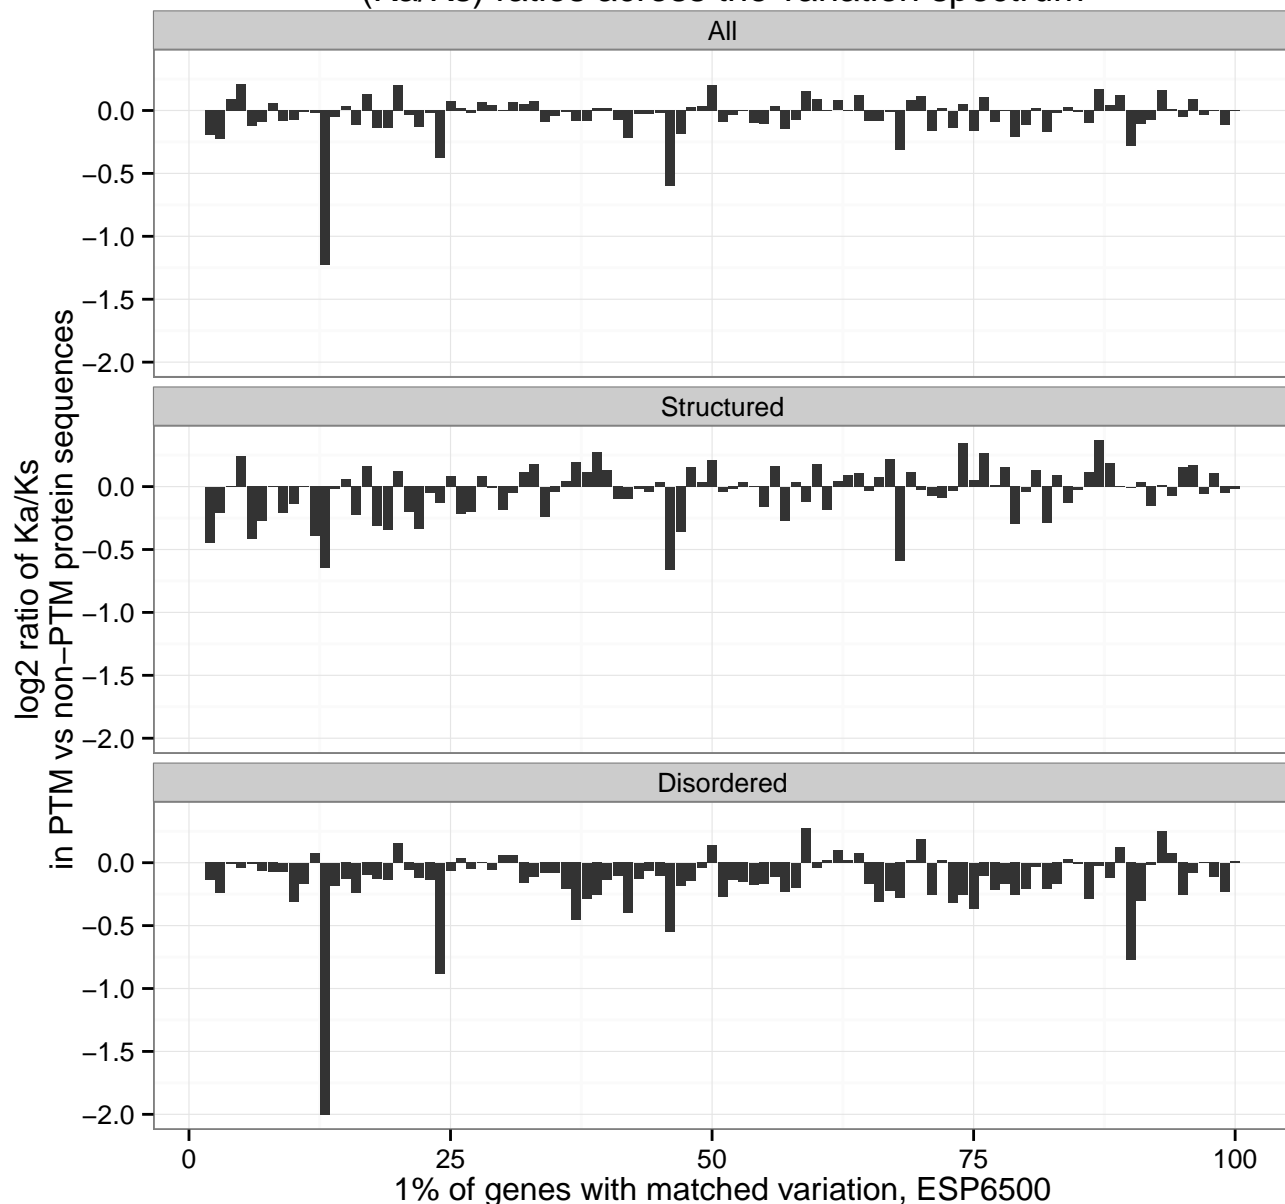

Supplement: S9 (10.1371/journal.pgen.1004919.s009) [file journal.pgen.1004919.s009]
