# Supplementary material for: Evolutionary Constraint and Disease Associations of Post-Translational Modification Sites in Human Genomes
Source: PLOS journal article supplement (doi:10.1371/journal.pgen.1004919), 2015-01-22

Rare PTM SNVs are enriched across the expression intensity spectrum  
Pearson  $r=0.12$ ;  $p=0.25$

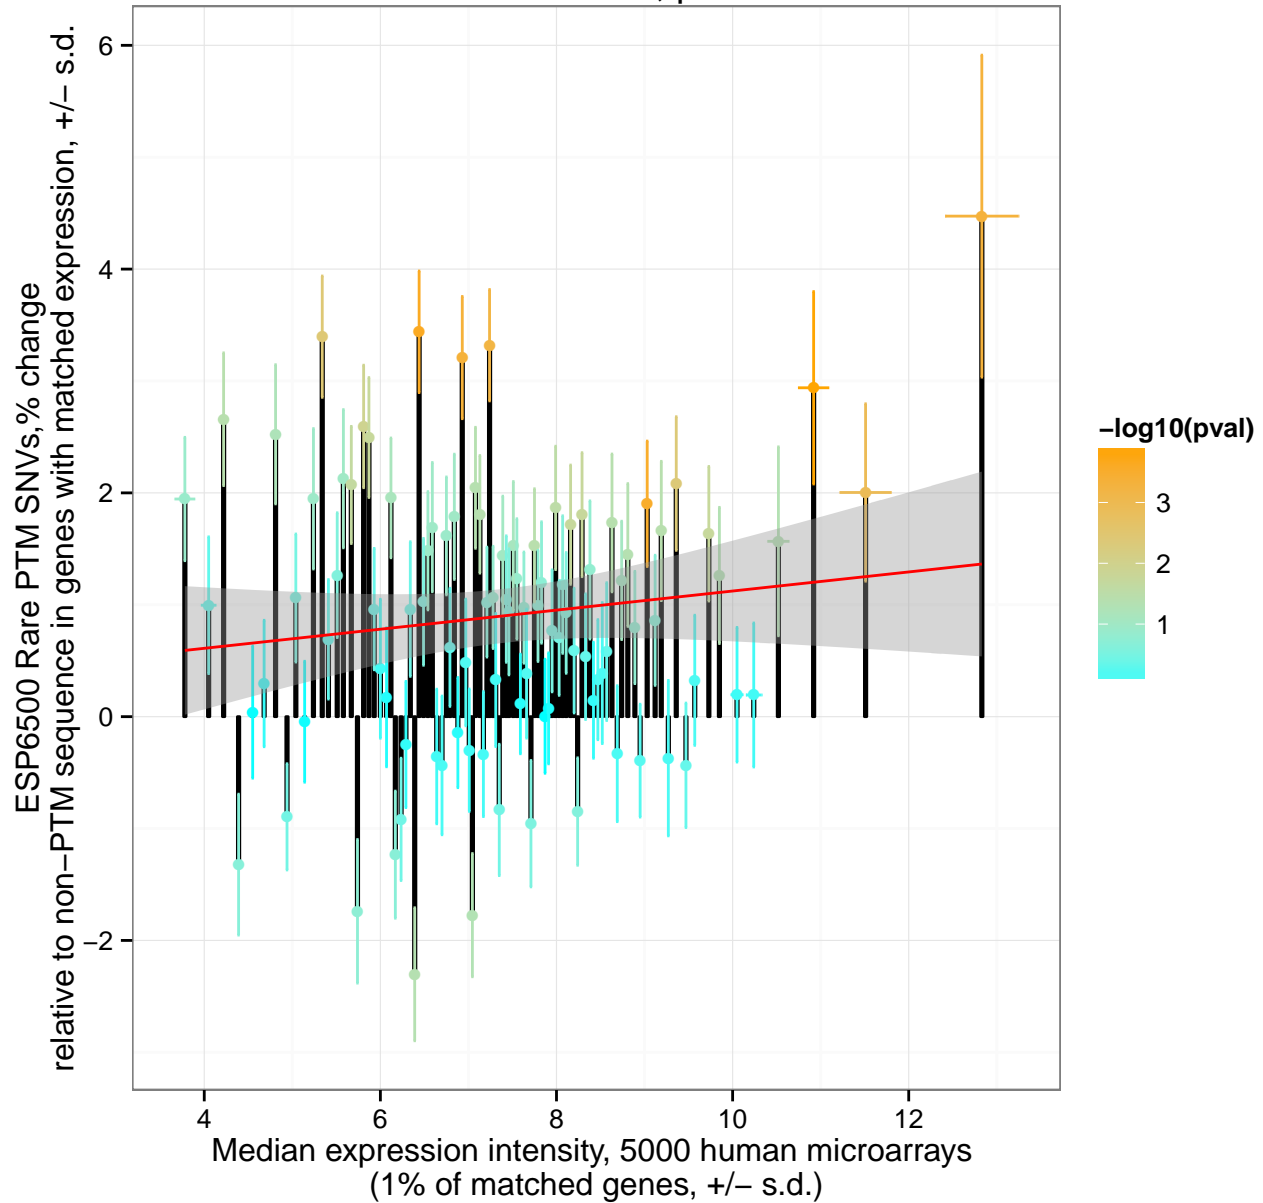

Supplement: S10 (10.1371/journal.pgen.1004919.s010) [file journal.pgen.1004919.s010]
