# Supplementary material for: Evolutionary Constraint and Disease Associations of Post-Translational Modification Sites in Human Genomes
Source: PLOS journal article supplement (doi:10.1371/journal.pgen.1004919), 2015-01-22

# Conservation of structured and disordered protein sequence

## Ancient and recent human genes

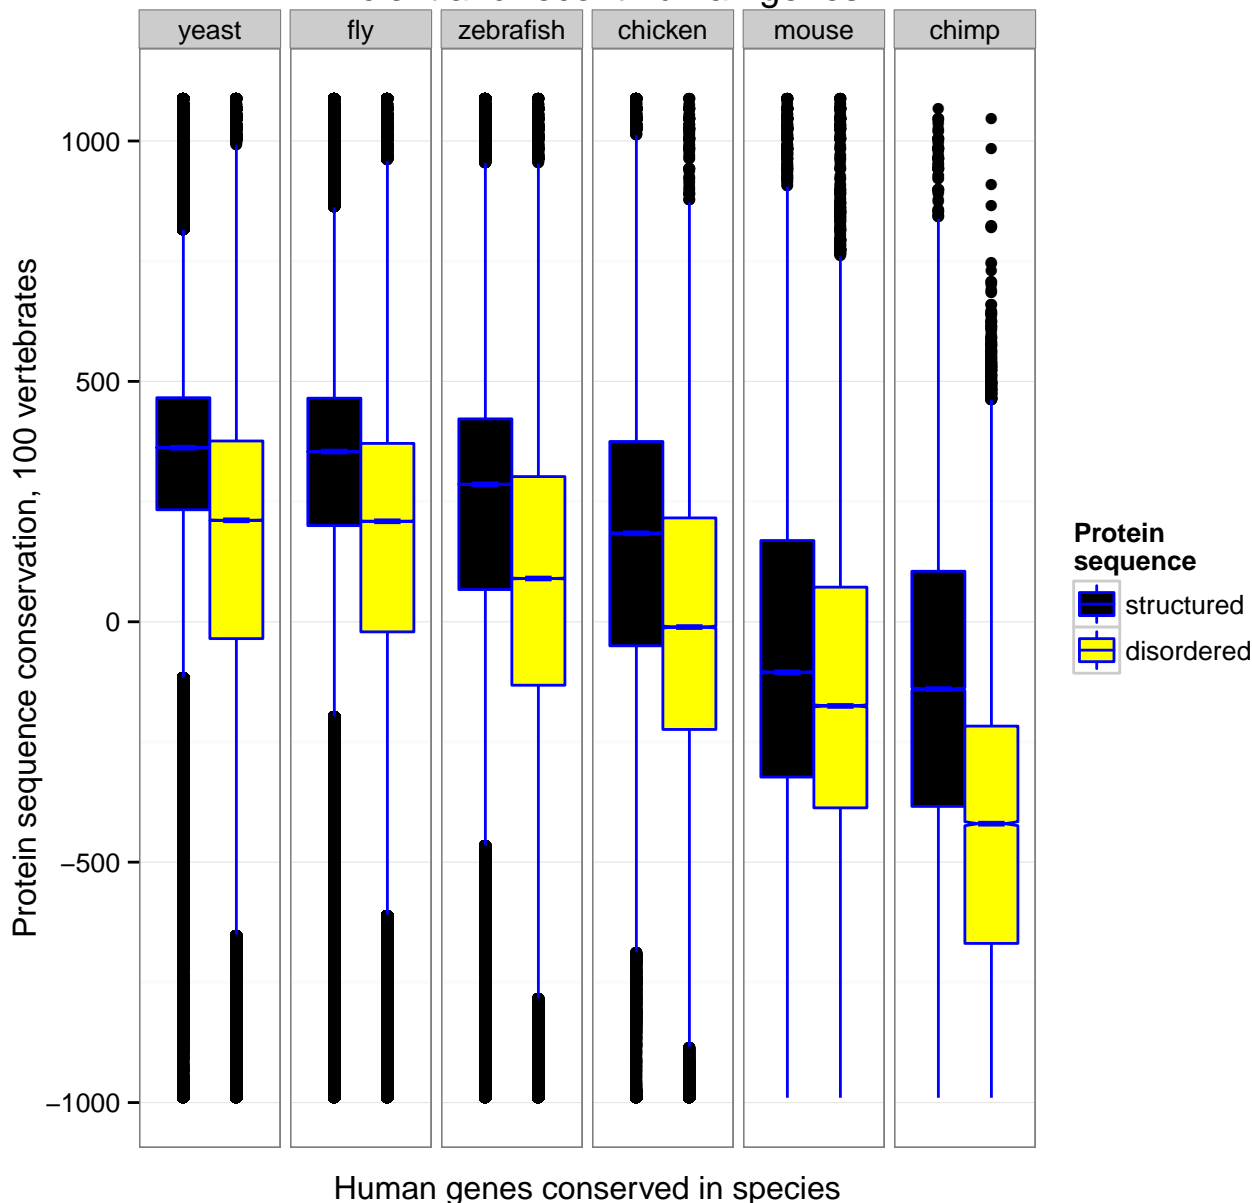

Supplement: S18 (10.1371/journal.pgen.1004919.s018) [file journal.pgen.1004919.s018]
